# Supplementary material
Source: publisher figshare collection journal article supplement (https://asha.figshare.com/articles/dataset/_/28462292)
Supplement: Supplementary file [file 1]

### Supplemental Material S3. Descriptive statistics for the essential vocal tremor group stratified by outcome measurement and condition.

#### Essential Vocal Tremor (N=5)

|                     | Listener Ratings                        |                  |        |              | Avg CPPS |                |        |            | Vocal Effort |                 |        |          |
|---------------------|-----------------------------------------|------------------|--------|--------------|----------|----------------|--------|------------|--------------|-----------------|--------|----------|
|                     | Obs.                                    | Mean $\pm$ SD    | Median | Min, Max     | Obs.     | Mean $\pm$ SD  | Median | Min, Max   | Obs.         | Mean $\pm$ SD   | Median | Min, Max |
| <b>Control 1</b>    |                                         |                  |        |              |          |                |        |            |              |                 |        |          |
| Sustained Phonation |                                         |                  |        |              | 10       | 14.9 $\pm$ 1.3 | 14.6   | 12.9, 17.3 |              |                 |        |          |
| Voice loaded        | Referent for paired comparison paradigm |                  |        |              | 30       | 9.0 $\pm$ 2.1  | 9.2    | 5.1, 13.3  | 5            | 33.8 $\pm$ 22.1 | 39     | 0, 61    |
| Voiceless loaded    |                                         |                  |        |              | 30       | 6.9 $\pm$ 1.1  | 7.0    | 5, 9.1     |              |                 |        |          |
| <b>Control 2</b>    |                                         |                  |        |              |          |                |        |            |              |                 |        |          |
| Sustained Phonation | 70                                      | -1.4 $\pm$ 34.9  | 0      | -78, 92      | 10       | 14.6 $\pm$ 3.0 | 15.3   | 10.4, 18.2 |              |                 |        |          |
| Voice loaded        | 105                                     | 3.5 $\pm$ 33.9   | 0      | -100, 82     | 30       | 8.9 $\pm$ 2.0  | 9.2    | 5.2, 12.1  | 5            | 26.1 $\pm$ 26.4 | 17     | 5, 70    |
| Voiceless loaded    | 105                                     | -1.0 $\pm$ 25.6  | 0      | -50, 62      | 30       | 6.8 $\pm$ 1.1  | 6.8    | 4.7, 8.5   |              |                 |        |          |
| <b>DAF</b>          |                                         |                  |        |              |          |                |        |            |              |                 |        |          |
| Sustained Phonation | 70                                      | -2.1 $\pm$ 36.0  | 0      | -80, 84      | 10       | 14.0 $\pm$ 2.0 | 13.7   | 11.8, 18.2 |              |                 |        |          |
| Voice loaded        | 105                                     | -29.5 $\pm$ 31.5 | -36    | -88, 62      | 30       | 9.8 $\pm$ 2.6  | 9.1    | 6.4, 17.2  | 5            | 29.3 $\pm$ 26.8 | 19     | 0, 70    |
| Voiceless loaded    | 105                                     | -22.6 $\pm$ 28.1 | -26    | -72, 94      | 30       | 8.1 $\pm$ 1.5  | 8.0    | 6, 11.4    |              |                 |        |          |
| <b>VTS</b>          |                                         |                  |        |              |          |                |        |            |              |                 |        |          |
| Sustained Phonation | 70                                      | -10.6 $\pm$ 30.3 | 0      | -86, 54      | 10       | 10.4 $\pm$ 3.7 | 10.6   | 4.3, 16.1  |              |                 |        |          |
| Voice loaded        | 105                                     | -8.5 $\pm$ 34.8  | 0      | -94, 80      | 30       | 7.7 $\pm$ 1.8  | 7.7    | 5.1, 11.5  | 5            | 24 $\pm$ 19.4   | 18.5   | 0, 46.5  |
| Voiceless loaded    | 105                                     | -8.2 $\pm$ 31.4  | 0      | -78, 74      | 30       | 6.1 $\pm$ 1.1  | 6.2    | 4.5, 7.8   |              |                 |        |          |
| <b>ENDO - A</b>     |                                         |                  |        |              |          |                |        |            |              |                 |        |          |
| Sustained Phonation | 70                                      | -8.1 $\pm$ 30.3  | 0      | -70, 50      | 8        | 13.9 $\pm$ 2.3 | 14.1   | 10.5, 18.1 |              |                 |        |          |
| Voice loaded        | 105                                     | -17.8 $\pm$ 32.0 | -16    | -84, 76      | 24       | 9.8 $\pm$ 2.8  | 9.9    | 5.1, 14.3  | 5            | 28.9 $\pm$ 22.4 | 22.5   | 2.5, 61  |
| Voiceless loaded    | 105                                     | -10.5 $\pm$ 26.6 | 0      | -100, 44     | 24       | 7.4 $\pm$ 1.6  | 7.7    | 4.8, 10.5  |              |                 |        |          |
| <b>ENDO + A</b>     |                                         |                  |        |              |          |                |        |            |              |                 |        |          |
| Sustained Phonation | 70                                      | -8.0 $\pm$ 35.9  | -7     | -92, 66      | 10       | 13.0 $\pm$ 1.9 | 12.9   | 10.2, 15.4 |              |                 |        |          |
| Voice loaded        | 105                                     | -11.0 $\pm$ 29.7 | -2     | -88 $\pm$ 82 | 30       | 8.9 $\pm$ 1.9  | 9.1    | 5.6, 12.7  | 5            | 29.6 $\pm$ 26.8 | 20.5   | 0, 70.5  |
| Voiceless loaded    | 105                                     | -5.6 $\pm$ 24.8  | 0      | -80, 56      | 30       | 6.9 $\pm$ 1.3  | 6.8    | 4.7, 9.2   |              |                 |        |          |
