# Supplementary material
Source: publisher figshare collection journal article supplement (https://asha.figshare.com/articles/dataset/_/28462292)
Supplement: Supplementary file [file 1]

## Supplemental Material S2. Descriptive statistics for the laryngeal dystonia group stratified by outcome measurement and condition.

### Laryngeal Dystonia (N=5)

|                     | Listener Ratings                        |                  |        |          | Avg CPPS |                |        |            | Vocal Effort |                 |        |            |
|---------------------|-----------------------------------------|------------------|--------|----------|----------|----------------|--------|------------|--------------|-----------------|--------|------------|
|                     | Obs.                                    | Mean $\pm$ SD    | Median | Min, Max | Obs.     | Mean $\pm$ SD  | Median | Min, Max   | Obs.         | Mean $\pm$ SD   | Median | Min, Max   |
| <b>Control 1</b>    |                                         |                  |        |          |          |                |        |            |              |                 |        |            |
| Sustained Phonation |                                         |                  |        |          | 10       | 15.9 $\pm$ 3.4 | 16.6   | 10.3, 20.4 |              |                 |        |            |
| Voice loaded        | Referent for paired comparison paradigm |                  |        |          | 30       | 9.3 $\pm$ 3.1  | 9.6    | 4.2, 14.3  | 5            | 54.2 $\pm$ 27.1 | 59.5   | 16, 84     |
| Voiceless loaded    |                                         |                  |        |          | 30       | 7.1 $\pm$ 2.5  | 6.8    | 3.5, 13.9  |              |                 |        |            |
| <b>Control 2</b>    |                                         |                  |        |          |          |                |        |            |              |                 |        |            |
| Sustained Phonation | 62                                      | -8.2 $\pm$ 38.2  | 0      | -100, 46 | 10       | 15.5 $\pm$ 3.1 | 16.4   | 9.9, 20.1  |              |                 |        |            |
| Voice loaded        | 93                                      | -8.7 $\pm$ 29.0  | 0      | -82, 86  | 30       | 9.1 $\pm$ 3.1  | 9.3    | 4.3, 16    | 5            | 35.5 $\pm$ 30.7 | 26.5   | 0.5, 69    |
| Voiceless loaded    | 93                                      | -6.7 $\pm$ 32.2  | 0      | -100, 68 | 30       | 6.6 $\pm$ 1.9  | 6.6    | 3.3, 10.1  |              |                 |        |            |
| <b>DAF</b>          |                                         |                  |        |          |          |                |        |            |              |                 |        |            |
| Sustained Phonation | 62                                      | -8.2 $\pm$ 41.2  | 0      | -100, 78 | 10       | 15.8 $\pm$ 3.2 | 15.8   | 11.3, 19.8 |              |                 |        |            |
| Voice loaded        | 93                                      | -21.9 $\pm$ 37.7 | -24    | -100, 78 | 30       | 10.7 $\pm$ 3.0 | 11.2   | 4.8, 16.3  | 5            | 55.4 $\pm$ 28.8 | 54     | 23.5, 100  |
| Voiceless loaded    | 93                                      | -23.1 $\pm$ 38.0 | -26    | -100, 72 | 30       | 8.8 $\pm$ 2.5  | 9.3    | 4.6, 13.2  |              |                 |        |            |
| <b>VTS</b>          |                                         |                  |        |          |          |                |        |            |              |                 |        |            |
| Sustained Phonation | 65                                      | -21.5 $\pm$ 36.4 | -20    | -98, 50  | 10       | 12.1 $\pm$ 2.2 | 12.6   | 6.2, 13.8  |              |                 |        |            |
| Voice loaded        | 96                                      | -13.5 $\pm$ 37.0 | 0      | -100, 80 | 30       | 7.6 $\pm$ 2.2  | 7.4    | 4.7, 15.7  | 5            | 48.6 $\pm$ 32.1 | 58.5   | 2.5, 84    |
| Voiceless loaded    | 93                                      | -13.1 $\pm$ 23.7 | 0      | -86, 40  | 30       | 6.5 $\pm$ 1.9  | 5.9    | 4.2, 11.1  |              |                 |        |            |
| <b>ENDO - A</b>     |                                         |                  |        |          |          |                |        |            |              |                 |        |            |
| Sustained Phonation | 48                                      | -11.5 $\pm$ 32.0 | 0      | -98, 54  | 8        | 15.3 $\pm$ 4.2 | 16.2   | 9.4, 19.9  |              |                 |        |            |
| Voice loaded        | 75                                      | 2.1 $\pm$ 28.0   | 0      | -60, 72  | 24       | 9.1 $\pm$ 3.3  | 9.1    | 3.7, 16.8  | 4            | 50.1 $\pm$ 25.6 | 45.8   | 27.5, 81.5 |
| Voiceless loaded    | 72                                      | 4.9 $\pm$ 22.6   | 0      | -46, 54  | 24       | 7.3 $\pm$ 3.0  | 6.7    | 3.4, 13.1  |              |                 |        |            |
| <b>ENDO + A</b>     |                                         |                  |        |          |          |                |        |            |              |                 |        |            |
| Sustained Phonation | 62                                      | -5.0 $\pm$ 35.2  | 0      | -92, 72  | 10       | 15.5 $\pm$ 3.4 | 16.6   | 10.3, 20.4 |              |                 |        |            |
| Voice loaded        | 99                                      | -4.1 $\pm$ 29.9  | 0      | -72, 78  | 30       | 9.4 $\pm$ 2.7  | 9.8    | 4.6, 15.4  | 5            | 37.6 $\pm$ 28.6 | 22     | 15.5, 84   |
| Voiceless loaded    | 93                                      | -6.8 $\pm$ 23.9  | 0      | -82, 58  | 30       | 7.6 $\pm$ 2.5  | 9.3    | 4.6, 13.2  |              |                 |        |            |
