# Supplementary material
Source: publisher figshare collection journal article supplement (https://asha.figshare.com/articles/dataset/_/28462292)
Supplement: Supplementary file [file 1]

## Supplemental Material S1. Descriptive statistics for the normal control group stratified by outcome measurement and condition.

### Normal Control (N=5)

|                     | Listener Ratings                        |                  |        |          | Avg CPPS |                |        |            | Vocal Effort |                 |        |          |
|---------------------|-----------------------------------------|------------------|--------|----------|----------|----------------|--------|------------|--------------|-----------------|--------|----------|
|                     | Obs.                                    | Mean $\pm$ SD    | Median | Min, Max | Obs.     | Mean $\pm$ SD  | Median | Min, Max   | Obs.         | Mean $\pm$ SD   | Median | Min, Max |
| Control 1           |                                         |                  |        |          |          |                |        |            |              |                 |        |          |
| Sustained Phonation |                                         |                  |        |          | 10       | 16.9 $\pm$ 2.4 | 18.1   | 12.1, 19.3 |              |                 |        |          |
| Voice loaded        | Referent for paired comparison paradigm |                  |        |          | 29       | 11.8 $\pm$ 2.3 | 11.6   | 7.7, 15.3  | 5            | 13.1 $\pm$ 21.3 | 0      | 0, 49    |
| Voiceless loaded    |                                         |                  |        |          | 29       | 8.7 $\pm$ 1.5  | 8.4    | 6.2, 11.5  |              |                 |        |          |
| Control 2           |                                         |                  |        |          |          |                |        |            |              |                 |        |          |
| Sustained Phonation | 65                                      | 1.5 $\pm$ 20     | 0      | -54, 50  | 10       | 17.3 $\pm$ 2.4 | 17.3   | 13.6, 21.5 |              |                 |        |          |
| Voice loaded        | 96                                      | -3.6 $\pm$ 13.4  | 0      | -46, 50  | 30       | 11.7 $\pm$ 2.2 | 11.2   | 8.1, 15.3  | 5            | 11.2 $\pm$ 25   | 0      | 0, 56    |
| Voiceless loaded    | 93                                      | -0.2 $\pm$ 16.3  | 0      | -46, 46  | 30       | 8.5 $\pm$ 1.2  | 8.4    | 6.2, 11    |              |                 |        |          |
| DAF                 |                                         |                  |        |          |          |                |        |            |              |                 |        |          |
| Sustained Phonation | 65                                      | 3.4 $\pm$ 19.1   | 0      | -64, 54  | 10       | 17.3 $\pm$ 2.8 | 17.5   | 12.9, 21.7 |              |                 |        |          |
| Voice loaded        | 96                                      | -9.5 $\pm$ 19.1  | 0      | -70, 30  | 30       | 12.4 $\pm$ 2.2 | 12.3   | 8.8, 15.9  | 5            | 17.4 $\pm$ 16.6 | 23.5   | 0, 36.5  |
| Voiceless loaded    | 93                                      | -8.5 $\pm$ 20.4  | 0      | -94, 42  | 30       | 9.7 $\pm$ 1.4  | 9.4    | 7.6, 12.7  |              |                 |        |          |
| VTS                 |                                         |                  |        |          |          |                |        |            |              |                 |        |          |
| Sustained Phonation | 62                                      | -4.7 $\pm$ 22.4  | 0      | -54, 46  | 10       | 15.3 $\pm$ 1.8 | 15.1   | 13, 18.5   |              |                 |        |          |
| Voice loaded        | 93                                      | -0.6 $\pm$ 11.0  | 0      | -38, 38  | 30       | 10.6 $\pm$ 1.8 | 10.4   | 7, 14      | 5            | 20 $\pm$ 19.3   | 23     | 0, 39.5  |
| Voiceless loaded    | 93                                      | -1.2 $\pm$ 15.2  | 0      | -48, 46  | 30       | 8.0 $\pm$ 1.0  | 8.0    | 6.2, 9.8   |              |                 |        |          |
| ENDO - A            |                                         |                  |        |          |          |                |        |            |              |                 |        |          |
| Sustained Phonation | 65                                      | -2.1 $\pm$ 20.7  | 0      | -50, 46  | 10       | 15.4 $\pm$ 1.3 | 15.3   | 13.3, 18.1 |              |                 |        |          |
| Voice loaded        | 93                                      | -0.04 $\pm$ 15.2 | 0      | -44, 56  | 30       | 11.8 $\pm$ 2.1 | 11.5   | 8.6, 15.1  | 5            | 16.7 $\pm$ 17   | 16.5   | 0, 37.5  |
| Voiceless loaded    | 93                                      | -2.2 $\pm$ 17.5  | 0      | -44, 68  | 30       | 8.8 $\pm$ 1.5  | 8.7    | 6.6, 12.7  |              |                 |        |          |
| ENDO + A            |                                         |                  |        |          |          |                |        |            |              |                 |        |          |
| Sustained Phonation | 62                                      | -2.6 $\pm$ 25.9  | 0      | -90, 46  | 10       | 16.1 $\pm$ 2.8 | 16.6   | 11.4, 20.5 |              |                 |        |          |
| Voice loaded        | 93                                      | -4.5 $\pm$ 15.3  | 0      | -74, 40  | 30       | 11.7 $\pm$ 2.3 | 10.8   | 7.8, 15.4  | 5            | 14.9 $\pm$ 10.9 | 15.5   | 0, 26    |
| Voiceless loaded    | 96                                      | -5.4 $\pm$ 18.0  | 0      | -56, 54  | 30       | 8.6 $\pm$ 1.4  | 8.4    | 6.4, 11.5  |              |                 |        |          |
